# Supplementary material
Source: publisher site journal article supplement (https://www.dovepress.com/article/230041)
Supplement: Supplementary file 1 [file get_supplementary_file.php]

Supplement table. All Spearman correlations (significant and not significant) between arterial stiffness parameters and other IPAH patients characteristics

| Parameters | Spearman correlation (r), significance (p) | CAVI right side | CAVI left side | PWVе | PWVm |
| --- | --- | --- | --- | --- | --- |
| PWVe | Correlation Coefficient | 0.30 | 0.28 | - | 0.39 |
|  | Sig. (2-tailed) | 0.042 | 0.67 | - | 0.008 |
| PWVm | Correlation Coefficient | 0.44 | 0.37 | - | - |
|  | Sig. (2-tailed) | 0.003 | 0.012 | - | - |
| Age | Correlation Coefficient | 0.43 | 0.50 | 0.27 | 0.27 |
|  | Sig. (2-tailed) | 0.003 | 0.0005 | 0.07 | 0.07 |
| Male-1, female-0 | Correlation Coefficient | 0.15 | 0.11 | 0.22 | 0.37 |
|  | Sig. (2-tailed) | 0.09 | 0.10 | 0.08 | 0.013 |
| BMI | Correlation Coefficient | 0.08 | 0.07 | 0.25 | 0.14 |
|  | Sig. (2-tailed) | 0.59 | 0.62 | 0.1 | 0.35 |
| SBP | Correlation Coefficient | 0.05 | 0.10 | 0.02 | 0.07 |
|  | Sig. (2-tailed) | 0.75 | 0.53 | 0.88 | 0.63 |
| DBP | Correlation Coefficient | 0.12 | 0.14 | 0.02 | 0.24 |
|  | Sig. (2-tailed) | 0.45 | 0.37 | 0.91 | 0.11 |
| HR | Correlation Coefficient | -0.05 | -0.15 | 0.13 | 0.18 |
|  | Sig. (2-tailed) | 0.75 | 0.32 | 0.41 | 0.23 |
| Total Cholesterol | Correlation Coefficient | 0.05 | 0.12 | 0.13 | 0.15 |
|  | Sig. (2-tailed) | 0.75 | 0.44 | 0.41 | 0.31 |
| Glucose | Correlation Coefficient | -0.17 | -0.12 | -0.02 | -0.17 |
|  | Sig. (2-tailed) | 0.28 | 0.43 | 0.9 | 0.26 |
| Uric acid | Correlation Coefficient | 0.30 | 0.24 | 0.36 | 0.58 |
|  | Sig. (2-tailed) | 0.043 | 0.11 | 0.014 | <0.0001 |
| GFR | Correlation Coefficient | -0.19 | -0.17 | -0.12 | -0.20 |
|  | Sig. (2-tailed) | 0.18 | 0.24 | 0.9 | 0.10 |
| Ntpro-BNP | Correlation Coefficient | 0.37 | 0.45 | 0.28 | 0.33 |
|  | Sig. (2-tailed) | 0.015 | 0.002 | 0.06 | 0.03 |
| Aorta SBP | Correlation Coefficient | -0.03 | -0.036 | 0.04 | 0.0029 |
|  | Sig. (2-tailed) | 0.84 | 0.81 | 0.79 | 0.98 |
| 6MWT | Correlation Coefficient | -0.31 | -0.45 | 0.03 | 0.006 |
|  | Sig. (2-tailed) | 0.035 | 0.002 | 0.86 | 0.97 |
| RA sq | Correlation Coefficient | 0.20 | 0.26 | 0.12 | 0.28 |
|  | Sig. (2-tailed) | 0.19 | 0.09 | 0.43 | 0.07 |
| TAPSE | Correlation Coefficient | -0.42 | -0.45 | -0.29 | -0.27 |
|  | Sig. (2-tailed) | 0.004 | 0.002 | 0.056 | 0.07 |
| PA SBP | Correlation Coefficient | 0,19 | 0.21 | -0.007 | 0.23 |
|  | Sig. (2-tailed) | 0.21 | 0.16 | 0.96 | 0.14 |
| mean PA BP | Correlation Coefficient | -0.18 | -0.08 | -0.10 | -0.005 |
|  | Sig. (2-tailed) | 0.26 | 0.62 | 0.55 | 0.97 |
| RA pressure | Correlation Coefficient | 0.10 | 0.20 | 0.13 | 0.19 |
|  | Sig. (2-tailed) | 0.52 | 0.21 | 0.42 | 0.23 |
| PAWP | Correlation Coefficient | -0.002 | 0.13 | 0.01 | 0.19 |
|  | Sig. (2-tailed) | 0.99 | 0.48 | 0.95 | 0.30 |
| CO | Correlation Coefficient | -0.06 | -0.09 | -0.05 | -0.01 |
|  | Sig. (2-tailed) | 0.78 | 0.67 | 0.82 | 0.96 |
| CI | Correlation Coefficient | -0.16 | -0.17 | -0.23 | -0.17 |
|  | Sig. (2-tailed) | 0.41 | 0.37 | 0.24 | 0.40 |
| SVR | Correlation Coefficient | 0.21 | 0.14 | 0.24 | 0.22 |
|  | Sig. (2-tailed) | 0.29 | 0.49 | 0.6 | 0.07 |
| PVR | Correlation Coefficient | -0.05 | -0.008 | -0.06 | -0.04 |
|  | Sig. (2-tailed) | 0.79 | 0.97 | 0.74 | 0.85 |
| AIx@75 | Correlation Coefficient  Sig. (2-tailed) | -0.11  0.47 | -0.04  0.81 | 0.05  0.75 | 0.10  0.52 |

AIx@75 – augmentation index adjusted to heart rate 75, CAVI - cardio-ankle vascular index, PWVm – pulse wave velocity of muscular type arteries, GFR – glomerular filtration rate, PWVe – pulse wave velocity of elastic type arteries, TAPSE – tricuspid annular plane systolic excursion, 6 MWT – 6 minute walk test distance, NT-pro BNP - N-terminal pro-B-type natriuretic peptide, CO – cardiac output, CI – cardiac output index, PVR – pulmonary vascular resistance, PAWP – pulmonary artery wedge pressure, RA – right atrium, PABP – pulmonary artery blood pressure, PA SBP – pulmonary artery systolic blood pressure, RA sq – right atrium square, HR – heart rate, BMI – body mass index, SBP – systolic blood pressure, DBP – diastolic blood pressure, SVR – systemic vascular resistance
